# Supplementary material
Source: Springer Nature journal article supplement (https://www.springermedizin.de/resource/supplementary/12889_2013_6632_MOESM2_ESM.pdf/9498648)
Supplement: MOESM2 [file 9498648]

## Social Determinants

### Socio-economic position

- Income
- Economic vulnerability
- Employment
- Occupation
- Education
- Language
- Social vulnerability

### Race/Ethnicity

### Immigrant/Nativity Status

### Place

- Neighborhood
- Household
- Geographic vulnerability
- Community size

## Other Variables

### Socio-demographics

- Age
- Sex

### Social Networks

- Social support
- Resources

### Other

- Disability
- Disaster experience
- Familiarity with preparedness
- Proximity to crisis
- Historical memory

## Communication Outcomes

### PHEP information access, use & exposure

- Access to Internet
- Watch news on PHEP
- Read newspapers

### Information seeking

- Purposive search for information on PHEP

### Trust/Credibility

### Information Processing

- Ability to understand PHEP information

### Information Utilization

- Capacity for action on PHEP information

## PHEP Outcomes

### Awareness/ Knowledge

- Risk Perception
- Uncertainty reduction

### Preventive Behaviors

- Evacuation behavior
- Preparedness
- Vaccination
- Quarantine

### Other PHEP Behaviors

Racial and social divides in PHEP-related morbidity and mortality outcomes

### Communication Inequalities

Exposure, Attention, Seeking, Processing
